# Supplementary material for: Genome-Wide Identification and Functional Analysis of the AP2/ERF Transcription Factor Family in Citrus Rootstock under Waterlogging Stress
Source: MDPI journal article supplement (doi:10.3390/ijms24108989), 2023-05-19
Supplement: s1 [file s1]

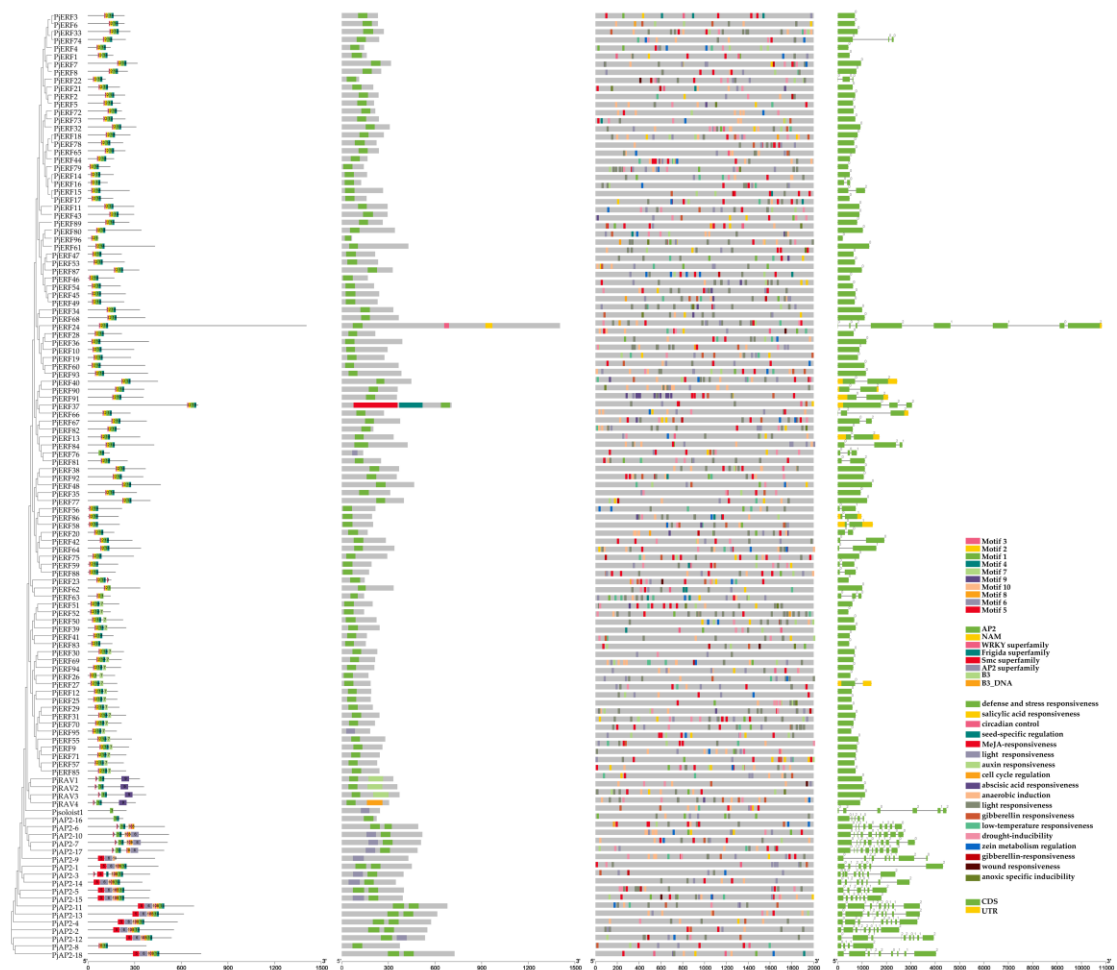

Figure S1. Phylogenetic relationship, conserved protein motif and gene structure analysis of *PjAP2/ERFs*.

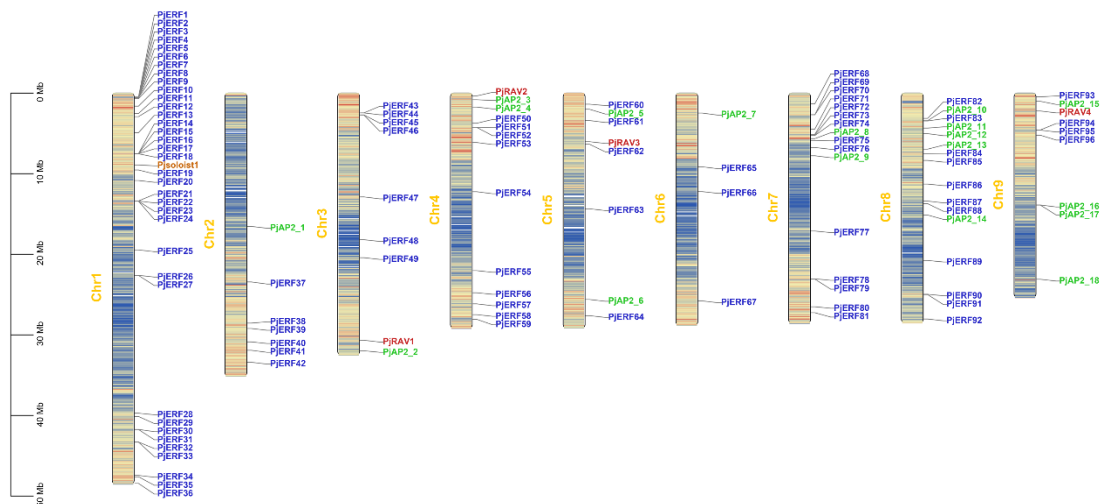

**Figure S2. The distribution of *Citrus junos* AP2/ERF genes in 9 chromosomes.** The scale bar on the left shows the length of the chromosome (Mb) and the chromosome number is displayed at the left of each chromosome.

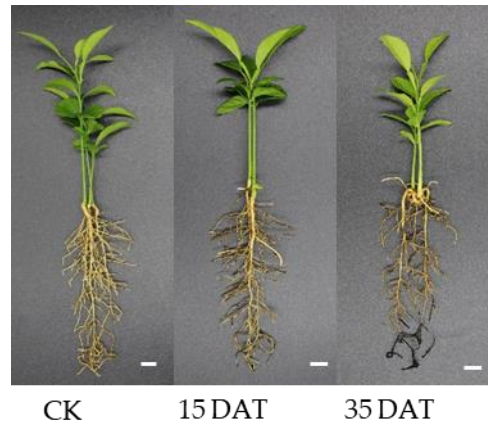

**Figure S3. Physiological analysis of *Citrus junos* cv. Pujiang Xiangcheng seedlings in response to waterlogging stress. Bars = 1 cm. DAT: Days After Treatment.**
