# Supplementary material for: Genome-Wide Identification and Functional Analysis of the AP2/ERF Transcription Factor Family in Citrus Rootstock under Waterlogging Stress
Source: Int J Mol Sci. 2023 May 19;24(10):8989. doi: 10.3390/ijms24108989 (PMC10218916; doi:10.3390/ijms24108989)
Supplement: Supplementary file 1 [file ijms-24-08989-s001.zip › Supplementary Tables.xlsx]

## Sheet: Table S1
Table S1. Physical and chemical aspects of AP2/ERF genes in the Citrus junos
Gene Name	ORF/bp	Molecular Weight/KD	pI	GRAVY	Subcellular Localization
CjERF1	161	18.0852	9.07	-1.027	nucleus
CjERF2	237	26.2279	5.8	-0.685	nucleus
CjERF3	233	26.1215	5.19	-0.774	nucleus
CjERF4	144	15.934	9.83	-0.72	nucleus
CjERF5	208	23.1657	9.23	-0.839	nucleus
CjERF6	233	25.6184	6.53	-0.621	nucleus
CjERF7	317	34.9754	5.23	-0.658	nucleus
CjERF8	254	27.9171	7.14	-0.662	nucleus
CjERF9	262	28.4426	8.21	-0.555	nucleus
CjERF10	295	32.1373	8.74	-0.714	nucleus
CjERF11	295	33.1858	4.96	-0.738	nucleus
CjERF12	190	21.2847	6.11	-0.777	nucleus
CjERF13	334	37.203	5.97	-0.884	nucleus
CjERF14	163	17.667	5.45	-0.867	nucleus
CjERF15	266	29.6551	8.29	-0.555	endomembrane system
CjERF16	125	14.3109	5.51	-0.968	nucleus
CjERF17	160	17.5252	8.96	-0.759	nucleus
CjERF18	271	29.4803	5.33	-0.641	nucleus
Cjsoloist1	246	27.8453	9.8	-1.011	chloroplast
CjERF19	275	30.3706	4.98	-0.549	nucleus
CjERF20	167	18.4276	7.72	-0.711	nucleus
CjERF21	203	22.672	8.01	-0.751	nucleus
CjERF22	112	12.5011	9.59	-0.742	nucleus
CjERF23	148	16.6413	6.2	-0.986	nucleus
CjERF24	1404	154.206	8.95	-0.277	nucleus
CjERF25	187	20.4148	5.38	-0.621	nucleus
CjERF26	172	19.2879	5.1	-0.395	nucleus
CjERF27	186	20.4427	5.03	-1.172	nucleus
CjERF28	216	24.0479	9.59	-0.584	nucleus
CjERF29	200	22.7437	5.43	-0.573	chloroplast
CjERF30	229	25.0076	5.21	-0.638	nucleus
CjERF31	243	27.2947	5.66	-0.621	nucleus
CjERF32	309	34.2452	6.05	-0.637	nucleus
CjERF33	271	29.427	9.47	-0.524	nucleus
CjERF34	332	36.9673	6.27	-0.636	nucleus
CjERF35	312	34.4978	8.33	-0.499	nucleus
CjERF36	390	41.7099	5.92	-0.368	nucleus
CjAP2_1	451	50.7889	5.63	-0.885	nucleus
CjERF37	707	81.0255	6.67	-0.664	nucleus
CjERF38	369	40.3752	7.62	-0.59	nucleus
CjERF39	244	26.693	6.73	-0.407	nucleus
CjERF40	448	48.0606	7.15	-0.645	nucleus
CjERF41	162	18.2754	9.42	-0.985	nucleus
CjERF42	284	31.1191	8.27	-0.453	mitochondrion
CjERF43	295	32.7703	4.96	-0.617	nucleus
CjERF44	166	18.4646	6.85	-0.575	nucleus
CjERF45	241	26.1819	8.67	-0.632	nucleus
CjERF46	168	18.5938	9.51	-0.592	nucleus
CjERF47	215	23.6557	9.22	-0.655	nucleus
CjERF48	466	51.9384	5.48	-0.788	nucleus
CjERF49	231	24.8789	9.6	-0.538	nucleus
CjRAV1	332	38.1638	8.62	-0.74	nucleus
CjAP2_2	551	60.8797	6.03	-0.71	nucleus
CjRAV2	358	40.9954	5.85	-0.535	nucleus
CjAP2_3	398	45.1586	6.45	-0.869	nucleus
CjAP2_4	575	62.3794	7.79	-0.611	nucleus
CjERF50	224	24.9859	4.72	-0.964	nucleus
CjERF51	199	22.0825	4.81	-0.453	nucleus
CjERF52	144	15.6094	7.87	-0.501	nucleus
CjERF53	234	25.8386	7.65	-0.788	nucleus
CjERF54	208	22.7325	9.47	-0.671	nucleus
CjERF55	280	30.0458	4.91	-0.64	nucleus
CjERF56	217	24.2689	6.39	-0.863	nucleus
CjERF57	228	25.1549	5.08	-0.533	nucleus
CjERF58	202	22.6476	9.1	-0.706	nucleus
CjERF59	192	21.6286	9.05	-0.613	nucleus
CjERF60	366	40.3423	4.76	-0.645	nucleus
CjAP2_5	400	44.9152	9.06	-0.698	nucleus
CjERF61	429	46.8539	6.46	-0.6	nucleus
CjRAV3	372	41.2375	8.9	-0.613	nucleus
CjERF62	334	36.7092	4.79	-0.708	nucleus
CjERF63	144	16.1743	6.75	-0.55	chloroplast
CjAP2_6	492	53.7846	8.8	-0.674	nucleus
CjERF64	339	38.2022	4.8	-0.972	nucleus
CjAP2_7	510	55.2837	6.06	-0.676	nucleus
CjERF65	239	27.3193	5.6	-0.68	nucleus
CjERF66	272	30.3269	5.54	-0.989	nucleus
CjERF67	376	41.5487	7.04	-0.851	nucleus
CjERF68	367	40.2871	4.82	-0.66	nucleus
CjERF69	215	22.8525	4.94	-0.567	nucleus
CjERF70	214	23.9538	5.18	-0.692	nucleus
CjERF71	245	27.3969	5.33	-0.895	nucleus
CjERF72	216	24.605	8.4	-0.586	chloroplast
CjERF73	239	26.9763	6.11	-0.721	nucleus
CjERF74	241	26.8107	6.83	-0.726	nucleus
CjAP2_8	374	41.9883	5.06	-0.717	nucleus
CjERF75	293	32.6395	6.27	-0.685	nucleus
CjERF76	138	15.0324	7.61	-0.155	nucleus
CjAP2_9	429	47.5711	9.07	-0.791	nucleus
CjERF77	400	44.7169	8.27	-0.72	nucleus
CjERF78	224	25.3372	5.56	-0.698	nucleus
CjERF79	142	15.9534	6.44	-1.115	nucleus
CjERF80	342	37.3567	4.83	-0.679	nucleus
CjERF81	253	28.374	8.32	-0.757	nucleus
CjERF82	204	23.0882	8.93	-0.742	nucleus
CjAP2_10	519	58.0499	6.64	-0.845	nucleus
CjERF83	155	17.1193	9.29	-0.639	chloroplast
CjAP2_11	680	75.3787	6.16	-0.731	nucleus
CjAP2_12	536	58.8929	6.17	-0.585	nucleus
CjAP2_13	615	68.3816	6.32	-0.853	nucleus
CjERF84	424	46.9099	4.62	-0.666	nucleus
CjERF85	243	26.8065	4.81	-0.6	chloroplast
CjERF86	195	21.3883	9.76	-0.653	nucleus
CjERF87	328	35.9143	9.53	-0.526	chloroplast
CjERF88	176	19.9296	8.83	-0.701	nucleus
CjAP2_14	348	39.1649	8.73	-1.017	nucleus
CjERF89	264	29.8123	7.76	-0.745	nucleus
CjERF90	360	40.0756	7.76	-0.689	nucleus
CjERF91	355	39.1935	5.93	-0.661	nucleus
CjERF92	354	39.3038	6.15	-0.545	nucleus
CjERF93	384	41.7091	4.77	-0.606	nucleus
CjAP2_15	393	44.6005	6.77	-0.744	nucleus
CjRAV4	305	34.6228	6.2	-0.57	nucleus
CjERF94	210	22.3078	5.1	-0.459	chloroplast
CjERF95	183	20.447	8.41	-0.739	chloroplast
CjERF96	67	7.98015	10.19	-0.839	chloroplast
CjAP2_16	225	25.0435	9.32	-0.741	chloroplast
CjAP2_17	488	54.2405	6.39	-0.761	nucleus
CjAP2_18	726	79.4476	5.92	-0.73	nucleus

## Sheet: Table S2
Table S2. Identify AP2/ERF genes in Citrus
	Citrus junos		Citrus clementina		Citrus sinensis		Citrus grandis		Citrus ichangensis		Poncirus trifoliata		Fortunella hindsii		Citrus reticulata		Citrus medica		Atalantia buxfoliata
AP2	18	0.151	22	0.15	15	0.112	16	0.122	16	0.235	19	0.14	20	0.125	18	0.134	19	0.137	17	0.144
RAV	4	0.034	4	0.027	5	0.037	5	0.038	5	0.074	5	0.037	7	0.044	4	0.03	5	0.036	4	0.034
soloist	1	0.008	4	0.027	3	0.022	1	0.008	1	0.015	1	0.007	3	0.019	2	0.015	1	0.007	2	0.017
ERF/DREB	96	0.807	117	0.796	111	0.828	109	0.832	46	0.676	111	0.816	130	0.813	110	0.821	114	0.82	95	0.805
Group I (A-6）	5	0.042	6	0.041	5	0.037	5	0.038	4	0.059	6	0.044	6	0.038	5	0.037	7	0.05	5	0.042
Group II (A-5）	6	0.05	8	0.054	7	0.052	7	0.053	5	0.074	7	0.051	8	0.05	7	0.052	9	0.065	8	0.068
Group III (A-1/-4/-5)	16	0.134	17	0.116	16	0.119	17	0.13	15	0.221	17	0.125	20	0.125	17	0.127	16	0.115	17	0.144
Group IV (A-2)	4	0.034	5	0.034	5	0.037	4	0.031	2	0.029	5	0.037	7	0.044	5	0.037	6	0.043	4	0.034
Group V (B -6)	12	0.101	13	0.088	13	0.097	11	0.084	12	0.176	15	0.11	24	0.15	12	0.09	12	0.086	12	0.102
Group VI (B -5)	4	0.034	4	0.027	4	0.03	4	0.031	3	0.044	5	0.037	5	0.031	4	0.03	4	0.029	4	0.034
Group VII (B-2)	4	0.034	7	0.048	6	0.045	7	0.053	1	0.015	4	0.029	8	0.05	6	0.045	3	0.022	4	0.034
Group VIII (B-1)	10	0.084	11	0.075	12	0.09	12	0.092	3	0.044	13	0.096	9	0.056	13	0.097	11	0.079	12	0.102
Group IX (B-3)	25	0.21	29	0.197	28	0.209	31	0.237	0	0	29	0.213	28	0.175	29	0.216	33	0.237	19	0.161
Group X (B-4)	9	0.076	15	0.102	11	0.082	9	0.069	0	0	7	0.051	12	0.075	9	0.067	11	0.079	7	0.059
Group VI-L (B-6)	1	0.008	2	0.014	4	0.03	2	0.015	1	0.015	3	0.022	3	0.019	1	0.007	2	0.014	1	0.008
Group Xb-L (B-6)	0	0	0	0	0	0	0	0	0	0	0	0	0	0	2	0.015	0	0	2	0.017
Total number	119		147		134		131		68		136		160		134		139		118

## Sheet: Table S3
Table S3. Primer sequences used in this paper
Gene	Primer Sequence
PjERF13	F: ACCATCATCAGCATAATC
	R: ATCATAACCATACAAGTCAA
PjERF36	F: CTCAACCTCCTAATAATAGT
	R: ACCAATAATAATCCAACCT
PjERF37	F: AAGAAGATGAGAGTAGCA
	R: AGCAACAATACGAAGAAG
PjAP2-3	F: GTAGCAAGACACCATCAC
	R: GCATAAGTTCCAAGATAGAGATA
PjERF1	F: GCGTTGGCTTATGATAGG
	R: ACACAGATTCAAGGAGGT
PjERF11	F: AACAACATCAACAATCTG
	R: TATCACTGGCAATATCTG
PjERF12	F: CGGACTCATTTCATCAGA
	R: AACTCAGGCAACTCAATC
PjERF20	F: GCAACAACATAACAGACCTA
	R: TTACCGACAGACTCATTACT
PjERF49	F: ACAACAGGAACAACAATAAGAA
	R: TTATCTCGGCAGCGTATC
EF-1α	F: GATGTCTACAAGATTGGT
	R: ATCTCAACTGACTTAACTT
PjERF13-SL	F: CTTGTACAAAGTGGTGATAGGGCCCGGATCCATGTGTGGCGGTTCTATCTT
	R: GAGAGACTGGTGATTTTTGCGGACTCTAGATTACAGAGCCTTGGAGTTCG
PjERF13-2301	F: GTGTTTTTTTTTTGAGCTCGGTACCATGTGTGGCGGTTCTATCTT
	R: AGCTTATCGATACCGTCGACTTACAGAGCCTTGGAGTTCG
